# Supplementary material for: syn-Benzene dioxides: chemoenzymatic synthesis from 2,3-cis-dihydrodiol derivatives of monosubstituted benzenes and their application in the synthesis of regioisomeric 1,2- and 3,4-cis-dihydrodiols and 1,4-dioxocins
Source: Royal Society of Chemistry journal article supplement (doi:10.1039/b704584k), 2007-01-01
Supplement: b704584k.pdf [file b704584k.pdf]

## SUPPLEMENTARY MATERIAL

### Catalytic *cis*-dihydroxylation of *cis*-dihydrodiols **2b<sub>S</sub>-d<sub>S</sub>**

#### **(1*S*,2*S*,3*S*,4*S*)-5-Chloro-5-cyclohexene-1,2,3,4-tetraol 6b.**

Colourless oil (1.08 g, 75%);  $[\alpha]_{\text{D}} -3.0$  (*c* 0.95, MeOH); (Found:  $\text{M}^+ - \text{H}_2\text{O}$ ,  $-\text{CHO}$ , 133.0056.  $\text{C}_5\text{H}_6\text{ClO}_2$  requires 133.0056);  $\delta_{\text{H}}$ (500 MHz,  $\text{D}_2\text{O}$ ) 4.00 (1 H, m, 3-H), 4.04 (1 H, m, 2-H), 4.25 (1 H, d,  $J_{4,3}$  4.6, 4-H), 4.34 (1 H, d,  $J_{1,2}$  3.6, 1-H), 6.04 (1 H, d,  $J_{6,1}$  3.6, 6-H);  $\delta_{\text{H}}$ (75 MHz,  $\text{D}_2\text{O}$ ) 68.05, 69.74, 70.05, 70.61, 127.32, 134.37; *m/z* (EI) 135 ( $\text{M}^+ [^{37}\text{Cl}] - \text{H}_2\text{O}, -\text{CHO}$ , 26%), 133 ( $\text{M}^+ - \text{H}_2\text{O}, -\text{CHO}$ , 66%), 122 (61), 120 (100), 93 (30), 91 (69), 55 (29), 41 (32), 29 (41).

#### **(1*S*,2*S*,3*S*,4*S*)-5-Bromo-5-cyclohexene-1,2,3,4-tetraol 6c.**

Colourless oil (1.385 g, 77%);  $[\alpha]_{\text{D}} +4.9$  (*c* 0.52, MeOH) (lit.<sup>37</sup>  $[\alpha]_{\text{D}} +4.4$ );  $\delta_{\text{H}}$ (300 MHz,  $\text{D}_2\text{O}$ ) 3.96 (1 H, dd,  $J_{3,4}$  2.0,  $J_{3,2}$  5.2, 3-H), 4.03 (1 H, d,  $J_{2,3}$  2.9, 2-H), 4.25 (2 H, m, 1-H and 4-H), 6.25 (1 H, d,  $J_{6,1}$  5.1, 6-H).

#### **(1*S*,2*S*,3*S*,4*S*)-5-Iodo-5-cyclohexene-1,2,3,4-tetraol 6d.**

Colourless oil (1.545 g, 71%);  $[\alpha]_{\text{D}} -3.0$  (*c* 0.45, MeOH); (Found:  $\text{M}^+$ , 271.9555.  $\text{C}_6\text{H}_9\text{IO}_4$  requires 271.9546);  $\delta_{\text{H}}$ (500 MHz,  $\text{D}_2\text{O}$ ) 3.96 (1 H, dd,  $J_{3,4}$  4.6,  $J_{3,2}$  2.2, 3-H), 4.02 (1 H, m, 2-H), 4.16 (1 H, m, 1-H), 4.21 (1 H, dd,  $J_{4,3}$  4.6,  $J_{4,6}$  0.6, 4-H), 6.54 (1 H, dd,  $J_{6,1}$  3.4,  $J_{6,4}$  0.6, 6-H);  $\delta_{\text{C}}$ (75 MHz,  $\text{D}_2\text{O}$ ) 68.41, 68.64, 68.89, 73.06, 101.60, 138.61; *m/z* 272 ( $\text{M}^+$ , 46%), 254 (75), 225 (45), 212 (100), 85 (48), 57 (53).

### Syntheses of *bis*-bromoacetates **7b-d**

#### **(1*R*,2*R*,5*R*,6*S*)-6-(Acetyloxy)-2,5-dibromo-3-chloro-3-cyclohexenyl acetate 7b.**

Colourless oil (1.02 g, 87%);  $[\alpha]_{\text{D}} +26$  (*c* 0.68,  $\text{CHCl}_3$ ); (Found:  $\text{M}^+ - \text{Br}$ , 308.9522.  $\text{C}_{10}\text{H}_{11}\text{BrClO}_4$  requires 308.9528);  $\delta_{\text{H}}$ (500 MHz,  $\text{CDCl}_3$ ) 2.11 (3 H, s, Me), 2.13 (3H, s, Me), 4.49 (1 H, d,  $J_{5,6}$  3.6, 5-H), 4.78(1 H, dd,  $J_{2,4}$  3.3,  $J_{2,1}$  8.0, 2-H), 5.56 (1 H, dd,  $J_{6,5}$  3.6,  $J_{6,1}$  2.5, 6-H), 5.72 (1 H, dd,  $J_{1,2}$  8.0  $J_{1,6}$  2.45, 1-H), 6.15 (1 H, d,  $J_{4,2}$  3.3, 4-H);  $\delta_{\text{C}}$ (125 MHz,  $\text{CDCl}_3$ ) 20.67, 20.79, 42.92, 46.03, 70.65, 72.40, 128.00, 132.28, 169.32,

169.45;  $m/z$  (EI) 393 ( $M^+$ , 9%), 391 ( $M^+$ , 14%), 331 (16), 311 (32), 309 (24), 251 (39), 249 (32), 209 (57), 207 (50), 128 (55), 43 (100).

**(1R,2R,5R,6S)-6-(Acetyloxy)-2,3,5-tribromo-3-cyclohexenyl acetate 7c.**

Yellow oil (1.12 g, 86%);  $[\alpha]_D +3.0$  ( $c$  1.38,  $\text{CHCl}_3$ ); (Found: C 27.7; H 2.5.  $\text{C}_{10}\text{H}_{11}\text{Br}_3\text{O}_4$  requires C 27.6; H 2.55%);  $\delta_{\text{H}}$ (500 MHz,  $\text{CDCl}_3$ ) 2.15 (3 H, s, Me), 2.13 (3 H, s, Me), 4.56 (1 H, d,  $J_{5,6}$  3.6, 5-H), 4.73 (1 H, dd,  $J_{2,4}$  3.2,  $J_{2,1}$  8.2, 2-H), 5.55 (1 H, dd,  $J_{6,5}$  3.6,  $J_{6,1}$  2.5, 6-H), 5.73 (1 H, dd,  $J_{1,2}$  8.2,  $J_{1,6}$  2.5, 1-H), 6.34 (1 H, d,  $J_{4,2}$  3.2, 4-H);  $\delta_{\text{C}}$ (125 MHz,  $\text{CDCl}_3$ ) 20.71, 20.80, 43.86, 48.08, 70.44, 72.53, 122.16, 132.02, 169.32, 169.43;  $m/z$  (EI) 357 ( $M^+$ -Br, 7%), 355 (15), 353 (7), 297 (12), 295 (26), 293 (12), 255 (30), 253 (51), 251 (31).

**(1R,2R,5R,6S)-6-(Acetyloxy)-2,5-dibromo-3-iodo-3-cyclohexenyl acetate 7d.**

Colourless crystals (1.156 g, 80%); mp 94-96 °C (from MeOH);  $[\alpha]_D -16.9$  ( $c$  0.88,  $\text{CHCl}_3$ ); (Found: C 24.9; H 2.1.  $\text{C}_{10}\text{H}_{11}\text{Br}_2\text{IO}_4$  requires C 24.9, H 2.3%);  $\delta_{\text{H}}$ (500 MHz,  $\text{CDCl}_3$ ) 2.11 (3 H, s, Me), 2.12 (3 H, s, Me), 4.57 (1 H, d,  $J_{5,6}$  3.5, 5-H), 4.69 (1 H, dd,  $J_{2,4}$  3.0,  $J_{2,1}$  8.2, 2-H), 5.52 (1 H, d,  $J_{1,6}$  2.2, 6-H), 5.72 (1 H, dd,  $J_{1,2}$  8.2,  $J_{1,6}$  2.2, 1-H), 6.55 (1 H, d,  $J_{4,2}$  3.0, 4-H);  $\delta_{\text{C}}$ (125 MHz,  $\text{CDCl}_3$ ) 20.69, 20.68, 45.06, 52.35, 70.22, 72.20, 96.8, 139.7, 169.34, 169.42;  $m/z$  (EI) 483 ( $M^+$ +1, 28%), 403 (15), 401 (15), 343 (40), 341 (40), 301 (57), 343 (40), 341 (40), 299 (62), 174 (69), 172 (69), 43 (100).

**Syntheses of *syn*-benzene dioxides 8b<sub>S</sub>-d<sub>S</sub>**

**(1S,2S,4S,7S)-5-Chloro-3,8-dioxa-tricyclo[5.1.0.0<sup>2,4</sup>]oct-5-ene 8b<sub>S</sub>.**

Colourless crystals (0.17 g, 78%); mp 36-38 °C;  $[\alpha]_D -58.9$  ( $c$  0.66,  $\text{CHCl}_3$ ); (Found:  $M^+$ , 143.9982.  $\text{C}_6\text{H}_5\text{ClO}_2$  requires 143.9978);  $\delta_{\text{H}}$ (500 MHz,  $\text{CDCl}_3$ ) 3.52 (2 H, m, 4-H and 7-H), 3.72 (1 H, dd,  $J_{1,2} = J_{1,7}$  3.2, 1-H), 3.78 (1 H, dd,  $J_{2,1} = J_{2,4}$  3.2, 2-H), 6.51 (1 H, dd,  $J_{6,7}$  4.1,  $J_{6,4}$  2.2, 6-H);  $\delta_{\text{C}}$ (125 MHz,  $\text{CDCl}_3$ ) 46.73, 48.73, 48.89, 50.29, 125.73, 136.78;  $m/z$  (EI) 144 ( $M^+$ , 11%), 117 (35), 115 (100), 81 (27), 51 (63).

**(1S,2S,4S,7S)-5-Bromo-3,8-dioxa-tricyclo[5.1.0.0<sup>2,4</sup>]oct-5-ene 8c<sub>S</sub>.**

Colourless crystals (0.224 g, 79%); mp 71-73 °C (lit.<sup>27</sup> mp 73 °C);  $[\alpha]_D -55.6$  ( $c$  0.4,  $\text{CHCl}_3$ ); (Found:  $M^+$ , 187.9476.  $\text{C}_6\text{H}_5\text{BrO}_2$  requires 187.9473);  $\delta_{\text{H}}$ (500 MHz,  $\text{CDCl}_3$ ),

3.44 (1 H, m, 7-H), 3.64 (1 H, m, 4-H), 3.74 (1 H, dd,  $J_{1,2} = J_{1,7}$  3.1, 1-H), 3.77 (1 H, dd,  $J_{2,1} = J_{2,4}$  3.0, 2-H), 6.82 (1 H, dd,  $J_{6,7}$  4.3,  $J_{6,4}$  2.2, 6-H);  $\delta_{\text{C}}$  (75 MHz,  $\text{CDCl}_3$ ), 46.60, 48.82, 49.27, 51.50, 126.31, 130.17;  $m/z$  (EI) 188 ( $\text{M}^+$ , 4%), 159 (90), 141 (44), 132 (57), 130 (56), 109 (58), 83 (65), 81 (95), 53 (94), 51 (100), 39 (70).

**(1*S*,2*S*,4*S*,7*S*)-5-Iodo-3,8-dioxa-tricyclo[5.1.0.0<sup>2,4</sup>]oct-5-ene 8*d*<sub>S</sub>.**

Colourless crystals (0.29 g, 82%); mp 102-104 °C ( $\text{Et}_2\text{O}$ /hexane);  $[\alpha]_{\text{D}} -59$  ( $c$  0.7,  $\text{CHCl}_3$ ); (Found:  $\text{M}^+$ , 235.9341.  $\text{C}_6\text{H}_5\text{IO}_2$  requires 235.9334);  $\delta_{\text{H}}$  (500 MHz,  $\text{CDCl}_3$ ) 3.26 (1 H, dd,  $J_{7,6} = J_{7,1}$  3.8, 7-H), 3.74 (3 H, m, 1-H, 2-H, 4-H), 7.20 (1 H, dd,  $J_{6,7}$  3.8,  $J_{6,4}$  1.1, 6-H);  $\delta_{\text{C}}$  (125 MHz,  $\text{CDCl}_3$ ) 46.43, 48.17, 49.90, 54.33, 100.14, 138.77;  $m/z$  (EI) 236 ( $\text{M}^+$ , 82%), 207 (89), 178 (23), 127 (29), 109 (29), 81 (77), 53 (100), 51 (84).

**Synthesis of *cis*-dihydrodiols 4*b*<sub>S</sub>-*d*<sub>S</sub>**

**(1*S*,2*R*)-4-Chloro-3,5-cyclohexadiene-1,2-diol 4*b*<sub>S</sub>.**

Colourless crystals (0.065 g, 75%); mp 84-86 °C;  $R_{\text{f}}$  0.25 (40%  $\text{EtOAc}$  in hexane);  $[\alpha]_{\text{D}} +20$  ( $c$  0.83,  $\text{MeOH}$ ); >98% ee; (Found:  $\text{M}^+$ , 146.0139.  $\text{C}_6\text{H}_7\text{ClO}_2$  requires 146.0139);  $\delta_{\text{H}}$  (500 MHz,  $\text{CDCl}_3$ ) 4.27 (1 H, dd,  $J_{2,1}$  6.4,  $J_{2,3}$  4.8, 2-H), 4.33 (1 H, dd,  $J_{1,2}$  6.4,  $J_{1,6}$  3.4, 1-H), 5.91 (1 H, dd,  $J_{5,6}$  9.9,  $J_{5,3}$  1.9, 5-H), 6.01 (1 H, dd,  $J_{6,5}$  9.9,  $J_{6,1}$  3.4, 6-H), 6.03 (1 H, dd,  $J_{3,2}$  4.8,  $J_{3,5}$  1.9, 3-H);  $\delta_{\text{C}}$  (125 MHz,  $\text{CDCl}_3$ ) 67.24, 67.71, 124.29, 126.91, 130.80, 132.55;  $m/z$  (EI) 146 ( $\text{M}^+$ , 41%), 130 (75), 128 (100), 119 (10), 117 (34), 111 (14), 102 (55), 100 (77), 81 (42), 63 (54), 53 (66), 39 (74).

**(1*S*,2*R*)-4-Bromo-3,5-cyclohexadiene-1,2-diol 4*c*<sub>S</sub>.**

Colourless crystals (0.08 g, 70%); mp 59-60 °C;  $R_{\text{f}}$  0.33 (50%  $\text{EtOAc}$  in hexane);  $[\alpha]_{\text{D}} +28$  ( $c$  0.79,  $\text{MeOH}$ ); >98% ee; (Found:  $\text{M}^+$ , 189.9632.  $\text{C}_6\text{H}_7\text{BrO}_2$  requires 189.9629);  $\delta_{\text{H}}$  (500 MHz,  $\text{CDCl}_3$ ) 2.22 (2 H, br s, OH), 4.22 (1 H, br s, 2-H), 4.30 (1 H, br s, 1-H), 5.92 (1 H, dd,  $J_{6,5}$  10.0,  $J_{6,1}$  3.5, 6-H), 6.02 (1 H, dd,  $J_{5,6}$  9.9,  $J_{5,3}$  1.7, 5-H), 6.27 (1 H, dd,  $J_{3,2}$  4.6,  $J_{3,5}$  1.7, 3-H);  $\delta_{\text{C}}$  (125 MHz,  $\text{CDCl}_3$ ) 67.13, 68.96, 119.63, 129.23, 129.27, 132.33;  $m/z$  (EI) 190 ( $\text{M}^+$ , 31%), 172 (40), 161 (24), 146 (50), 144 (48), 111 (21), 83 (38), 81 (34), 65 (100), 63 (17), 55 (53), 53 (43), 39 (57).

**(1*S*,2*R*)-4-Iodo-3,5-cyclohexadiene-1,2-diol 4d<sub>5</sub>.**

Colourless crystals (0.11 g, 77%); mp 59-60 °C;  $R_f$  0.38 (50% EtOAc in hexane);  $[\alpha]_D^{25} +43$  ( $c$  0.77, MeOH); >98% ee; (Found:  $M^+$ , 237.9479.  $C_6H_7IO_2$  requires 237.9491);  $\delta_H$ (500 MHz,  $CDCl_3$ ) 4.16 (1 H, dd,  $J_{2,1}$  6.2,  $J_{2,3}$  4.3, 2-H), 4.26 (1 H, dd,  $J_{1,2}$  6.2,  $J_{1,6}$  3.8, 1-H), 5.78 (1 H, dd,  $J_{6,5}$  9.8,  $J_{6,1}$  3.8, 6-H), 6.15 (1 H, dd,  $J_{5,6}$  9.8,  $J_{5,3}$  1.5, 5-H), 6.58 (1 H, dd,  $J_{3,2}$  4.3,  $J_{3,5}$  1.5, 3-H);  $\delta_C$ (125 MHz,  $CDCl_3$ ) 66.14, 69.45, 91.20, 130.80, 132.81, 137.89;  $m/z$  (EI) 238 ( $M^+$ , 13%), 220 (100), 111 (18), 93 (51), 83 (24), 65 (74), 55 (30), 39 (46).
